# Supplementary material for: An Update on Myocarditis in Forensic Pathology
Source: MDPI journal article supplement (doi:10.3390/diagnostics14070760), 2024-04-03
Supplement: s1 [file s1]

Supplementary material Table S1

| LM                                                | CASES                                                             | HISTOPATHOLOGY                                                                                                                                                                                                                                                                                                                                                                                                                                                               | IMAGE LINK                                                                                                                                                                                                                                                                                                                                                                                                                                                                                                                                                                                                                                                                                                                                                  |
|---------------------------------------------------|-------------------------------------------------------------------|------------------------------------------------------------------------------------------------------------------------------------------------------------------------------------------------------------------------------------------------------------------------------------------------------------------------------------------------------------------------------------------------------------------------------------------------------------------------------|-------------------------------------------------------------------------------------------------------------------------------------------------------------------------------------------------------------------------------------------------------------------------------------------------------------------------------------------------------------------------------------------------------------------------------------------------------------------------------------------------------------------------------------------------------------------------------------------------------------------------------------------------------------------------------------------------------------------------------------------------------------|
| Leone O, et al.<br>Virchows Arch. 2019<br>(5)     | 45-year male<br>40-year female<br>20-year male<br>30-year female  | <p>-Myocyte damage<br/>T-lymphocytes with a minor component of macrophages; neutrophils are attracted by myocyte necrosis</p> <p>- Lymphocytic infiltrate is limited but is anyway associated with myocyte damage</p> <p>- Control biopsy in after previous histologic diagnosis of multifocal lymphocytic myocarditis. Lymphocytic infiltrate is reduced and mainly localized within the mesenchymal/fibrous reparative tissue</p> <p>-Immunohistochemistry: CD3+ CD68+</p> | <a href="https://media.springernature.com/full/springer-static/image/art%3A10.1007%2Fs00428-019-02615-8/MediaObjects/428_2019_2615_Fig1_HTML.jpg?as=webp">https://media.springernature.com/full/springer-static/image/art%3A10.1007%2Fs00428-019-02615-8/MediaObjects/428_2019_2615_Fig1_HTML.jpg?as=webp</a>                                                                                                                                                                                                                                                                                                                                                                                                                                               |
| Kindermann I, et al. J Am Coll Cardiol. 2012 (11) | Patients with <u>acute myocarditis</u>                            | <p>-Necrotic myocytes<br/>-Mononuclear cell infiltrates<br/>-Immunohistochemistry: CD3+</p>                                                                                                                                                                                                                                                                                                                                                                                  | <a href="https://ars.els-cdn.com/content/image/1-s2.0-S0735109711052004-gr4.jpg">https://ars.els-cdn.com/content/image/1-s2.0-S0735109711052004-gr4.jpg</a>                                                                                                                                                                                                                                                                                                                                                                                                                                                                                                                                                                                                 |
| Caforio AL, et al. Eur Heart J. 2007 (13)         | EMB from 174 subjects with arrhythmias and heart transplantation. | <p>-Myocyte necrosis<br/>-Fibrosis</p> <p>-<u>162 EMB: lymphocytes infiltrate</u><br/>-5 EMB: giant cells infiltrate<br/>-7 EMB: others mixed infiltrate</p> <p>-PCR analysis for viruses was performed</p>                                                                                                                                                                                                                                                                  | <a href="https://oup.silverchair-cdn.com/oup/backfile/Content_public/Journal/eurheartj/28/11/10.1093_eurheartj_ehm076/2/ehm07601.gif?Expires=1697016563&amp;Signature=1grS0gGlcmtcJYuxiWhJ9ZqeabjP8D7OkVYEo-GuWlInDYb5gX8oQFbAZOVrKkWeAtiDIWNAsbzhsU0VZad8TyrE8pKD3ApbhO7bdRyvulKKHDI9BtHnp-QyY5POvwY5WbK7xtdvXz2uYo3phqerIJUySNKAIEJfHtnCrqOtD9-92gXgVc~kWg8bqkqiUq1ZEYcECKJc-">https://oup.silverchair-cdn.com/oup/backfile/Content_public/Journal/eurheartj/28/11/10.1093_eurheartj_ehm076/2/ehm07601.gif?Expires=1697016563&amp;Signature=1grS0gGlcmtcJYuxiWhJ9ZqeabjP8D7OkVYEo-GuWlInDYb5gX8oQFbAZOVrKkWeAtiDIWNAsbzhsU0VZad8TyrE8pKD3ApbhO7bdRyvulKKHDI9BtHnp-QyY5POvwY5WbK7xtdvXz2uYo3phqerIJUySNKAIEJfHtnCrqOtD9-92gXgVc~kWg8bqkqiUq1ZEYcECKJc-</a> |

|                                                            |                                 |                                                                                                                                                                                                                                                                         |                                                                                                                                                                                                                                                                                                                                                                                                                                                                                               |
|------------------------------------------------------------|---------------------------------|-------------------------------------------------------------------------------------------------------------------------------------------------------------------------------------------------------------------------------------------------------------------------|-----------------------------------------------------------------------------------------------------------------------------------------------------------------------------------------------------------------------------------------------------------------------------------------------------------------------------------------------------------------------------------------------------------------------------------------------------------------------------------------------|
|                                                            |                                 |                                                                                                                                                                                                                                                                         | YKuyIbxzBI3omqnKwaar7YG1ICwyzd<br>GfFwv8STYWjkztkx6zzhfAKecOhnnsC<br>xmbYWijthyYo~zyomri5Sh4hXrYPUI<br>M5eDMCmaaT99OfXUc27SgXtBOQZt<br>eO4Cb54a9ug6EsQskyYHUQ__&Key-<br>Pair-Id=APKAIE5G5CRDK6RD3PGA                                                                                                                                                                                                                                                                                          |
| Mahler L, McCleskey B. Am J Forensic Med Pathol. 2022 (16) | 2-year-old African American boy | <ul style="list-style-type: none"> <li>-Myocytolysis</li> <li>- Karyorrhectic debris</li> <li>-Lymphohistiocytic infiltrate</li> <li>-Lymphocytic infiltrate</li> <li>-Myocarditis likely viral in origin</li> <li>-PCR for virus negative</li> </ul>                   | <a href="https://www.ncbi.nlm.nih.gov/pmc/articles/PMC9076121/bin/fmp-43-e12-g003.jpg">https://www.ncbi.nlm.nih.gov/pmc/articles/PMC9076121/bin/fmp-43-e12-g003.jpg</a>                                                                                                                                                                                                                                                                                                                       |
| Kanaoka K, et al. Circulation 2022 (17)                    | EMB of 215 patients             | <ul style="list-style-type: none"> <li>- Myocytes damage</li> <li>- <u>162 LM with lymphocytic infiltrate</u></li> <li>- 42 EM with eosinophilic infiltrate</li> <li>- 11 GCM with giant cell infiltrate</li> </ul>                                                     | <a href="https://www.ahajournals.org/reader/content/184510a048b/10.1161/CIRCULATIONAHA.121.058869/format/epub/EPUB/graphic/circulationaha.121.058869.fig03.jpg?hmac=1693997579-CroByceU73XB44vh0kimzQ5OcO9BSPSfyZ5KJi86eak%3D">https://www.ahajournals.org/reader/content/184510a048b/10.1161/CIRCULATIONAHA.121.058869/format/epub/EPUB/graphic/circulationaha.121.058869.fig03.jpg?hmac=1693997579-CroByceU73XB44vh0kimzQ5OcO9BSPSfyZ5KJi86eak%3D</a>                                       |
| Kawada JI, et al. J Cardiol. 2021 (18)                     | Five pediatric patients         | <ul style="list-style-type: none"> <li>- LM was observed in all patients except in patient 5.</li> <li>- CD3+ CD68+</li> <li>-Similar levels of CD4+ and CD8+ T cells were observed in patient 1, while CD8+ cells were predominant in patients 2, 3, and 4.</li> </ul> | <a href="https://ars.els-cdn.com/content/image/1-s2.0-S0914508720302896-gr2.jpg">https://ars.els-cdn.com/content/image/1-s2.0-S0914508720302896-gr2.jpg</a><br><br><a href="https://ars.els-cdn.com/content/image/1-s2.0-S0914508720302896-gr3.jpg">https://ars.els-cdn.com/content/image/1-s2.0-S0914508720302896-gr3.jpg</a><br><a href="https://ars.els-cdn.com/content/image/1-s2.0-S0914508720302896-gr1.jpg">https://ars.els-cdn.com/content/image/1-s2.0-S0914508720302896-gr1.jpg</a> |

|                                                   |                                                     |                                                                                                                                                                                                                                                                                                                                                                                                                                                 |                                                                                                                                                                                                                                                                                                               |
|---------------------------------------------------|-----------------------------------------------------|-------------------------------------------------------------------------------------------------------------------------------------------------------------------------------------------------------------------------------------------------------------------------------------------------------------------------------------------------------------------------------------------------------------------------------------------------|---------------------------------------------------------------------------------------------------------------------------------------------------------------------------------------------------------------------------------------------------------------------------------------------------------------|
|                                                   |                                                     | <p>-Conversely, high infiltration of CD68+ cells were seen in patients 2 and 4. CD20+ and CD138+ cells were identified in patient 3</p> <p>No significant virus-derived reads were detected</p>                                                                                                                                                                                                                                                 |                                                                                                                                                                                                                                                                                                               |
| Huang Z, et al. J Int Med Res. 2022 (19)          | 63-year-old woman                                   | <p>-Lymphohistiocytic infiltrate</p> <p>-Immunohistochemistry: CD3+ CD68+</p>                                                                                                                                                                                                                                                                                                                                                                   | <a href="https://www.ncbi.nlm.nih.gov/pmc/articles/PMC9251992/bin/10.1177_03000605221108933-fig4.jpg">https://www.ncbi.nlm.nih.gov/pmc/articles/PMC9251992/bin/10.1177_03000605221108933-fig4.jpg</a>                                                                                                         |
| <b>LHM</b>                                        |                                                     |                                                                                                                                                                                                                                                                                                                                                                                                                                                 |                                                                                                                                                                                                                                                                                                               |
| Leone O, et al. Virchows Arch. 2019 (5)           | 17-year-old male with juvenile idiopathic arthritis | <p>-Active multifocal myocarditis</p> <p>-Macrophages mixed with fibrin and platelets, and minor component of granulocytes and T lymphocytes</p> <p>-Microthrombi and granulocytes were also present in some small vessels.</p> <p>-Immunohistochemistry: CD68+</p> <p>-PCR for viral genomes on myocardial tissue and blood was negative as were other laboratory tests for serum immunologic assessment and bacterial or viral infections</p> | <a href="https://media.springernature.com/full/springer-static/image/art%3A10.1007%2Fs00428-019-02615-8/MediaObjects/428_2019_2615_Fig6_HTML.png?as=webp">https://media.springernature.com/full/springer-static/image/art%3A10.1007%2Fs00428-019-02615-8/MediaObjects/428_2019_2615_Fig6_HTML.png?as=webp</a> |
| Kindermann I, et al. J Am Coll Cardiol. 2012 (11) | Patients with <u>chronic myocarditis</u>            | <p>-CD68+ cells are mainly present in areas with fibrosis</p> <p>-In situ hybridization reveals PVB19 nucleic acid in endothelial cells of an arteriole in a</p>                                                                                                                                                                                                                                                                                | <a href="https://ars.els-cdn.com/content/image/1-s2.0-S0735109711052004-gr4.jpg">https://ars.els-cdn.com/content/image/1-s2.0-S0735109711052004-gr4.jpg</a>                                                                                                                                                   |

|                                                  |                                                                   |                                                                                                                           |                                                                                                                                                                                                                                                                                                                                                                                                                                                                                                                                                                                                                                                                                                                                                                                                                                                                                                                                                                                                                                                                                                                                                       |
|--------------------------------------------------|-------------------------------------------------------------------|---------------------------------------------------------------------------------------------------------------------------|-------------------------------------------------------------------------------------------------------------------------------------------------------------------------------------------------------------------------------------------------------------------------------------------------------------------------------------------------------------------------------------------------------------------------------------------------------------------------------------------------------------------------------------------------------------------------------------------------------------------------------------------------------------------------------------------------------------------------------------------------------------------------------------------------------------------------------------------------------------------------------------------------------------------------------------------------------------------------------------------------------------------------------------------------------------------------------------------------------------------------------------------------------|
|                                                  |                                                                   | patient with chronic myocarditis, whereas enterovirus ribonucleic acid is detected in several myocytes                    |                                                                                                                                                                                                                                                                                                                                                                                                                                                                                                                                                                                                                                                                                                                                                                                                                                                                                                                                                                                                                                                                                                                                                       |
| Cooper LT Jr. N Engl J Med. 2009 (12)            | patient with acute myocarditis without other specific indications | -Myocyte damage<br>- Immunohistochemistry: CD3+ CD68+                                                                     | <a href="https://www.ncbi.nlm.nih.gov/pmc/articles/PMC5814110/bin/nihms940711f1.jpg">https://www.ncbi.nlm.nih.gov/pmc/articles/PMC5814110/bin/nihms940711f1.jpg</a>                                                                                                                                                                                                                                                                                                                                                                                                                                                                                                                                                                                                                                                                                                                                                                                                                                                                                                                                                                                   |
| <b>NM</b>                                        |                                                                   |                                                                                                                           |                                                                                                                                                                                                                                                                                                                                                                                                                                                                                                                                                                                                                                                                                                                                                                                                                                                                                                                                                                                                                                                                                                                                                       |
| Somers GR, et al. Arch Pathol Lab Med. 2005 (25) | Five drownings                                                    | -Occasional neutrophils foci of myocyte necrosis<br>-Lymphocytes infiltrate                                               | <a href="https://allen.silverchair-cdn.com/allen/content_public/journal/apl/129/2/10.5858_2005-129-205-aodami/1/i1543-2165-129-2-205-f01.jpeg?Expires=1697106412&amp;Signature=Im1V2MKPWNCnUIsxx9r8YCzVVa_aSJKMW69cOC8oIE0744IOoJQDjar-FEvpAy2Pkq4F4shpcADBehgS-G63H4piw-7gU9ZeSaob4taiYPR00NdhNsPjol2sj82~cyFXA55QuUdwWM4t0TdI~E9vjtSH~oGJtcZPalnYdoSaTqpIFHSGLC1LTD~Ok4i5iK7OfRIG7DDcSlQNJWV-szLJPQ-8fQ0D62uRBcRLOQbNbN3iSrIb7pTPrtZQS5sLWAvlADVDM1bd5M~W~aJoNK5WaWaUDQUxEK1cBMDGRGFQ7sHehrTDWYbk2hm2EOvxQVPwohA4dRhLp2y~ceeCQy0xkcQ_&amp;Key-Pair-Id=APKAIE5G5CRDK6RD3PGA">https://allen.silverchair-cdn.com/allen/content_public/journal/apl/129/2/10.5858_2005-129-205-aodami/1/i1543-2165-129-2-205-f01.jpeg?Expires=1697106412&amp;Signature=Im1V2MKPWNCnUIsxx9r8YCzVVa_aSJKMW69cOC8oIE0744IOoJQDjar-FEvpAy2Pkq4F4shpcADBehgS-G63H4piw-7gU9ZeSaob4taiYPR00NdhNsPjol2sj82~cyFXA55QuUdwWM4t0TdI~E9vjtSH~oGJtcZPalnYdoSaTqpIFHSGLC1LTD~Ok4i5iK7OfRIG7DDcSlQNJWV-szLJPQ-8fQ0D62uRBcRLOQbNbN3iSrIb7pTPrtZQS5sLWAvlADVDM1bd5M~W~aJoNK5WaWaUDQUxEK1cBMDGRGFQ7sHehrTDWYbk2hm2EOvxQVPwohA4dRhLp2y~ceeCQy0xkcQ_&amp;Key-Pair-Id=APKAIE5G5CRDK6RD3PGA</a> |
| Hiraiwa H, et al. J Cardiol Cases 2022 (26)      | 2-year-old man with streptococcal pharyngitis                     | - Micro-abscesses<br>- Neutrophilic granulocytes<br>- Gram stain + indicating phagocytosis of streptococci by neutrophils | <a href="https://www.ncbi.nlm.nih.gov/pmc/articles/PMC9214811/bin/gr2.jpg">https://www.ncbi.nlm.nih.gov/pmc/articles/PMC9214811/bin/gr2.jpg</a>                                                                                                                                                                                                                                                                                                                                                                                                                                                                                                                                                                                                                                                                                                                                                                                                                                                                                                                                                                                                       |

|                                          |                                                                              |                                                                                                                                                                                                                  |                                                                                                                                                                                                                                                                                                                                                                                                                                                                                                                                                                                                                        |
|------------------------------------------|------------------------------------------------------------------------------|------------------------------------------------------------------------------------------------------------------------------------------------------------------------------------------------------------------|------------------------------------------------------------------------------------------------------------------------------------------------------------------------------------------------------------------------------------------------------------------------------------------------------------------------------------------------------------------------------------------------------------------------------------------------------------------------------------------------------------------------------------------------------------------------------------------------------------------------|
| Shilkin KB. Postgrad Med J. 1969 (27)    | A 61-year-old male                                                           | Diffuse or focal infiltration of polymorphonuclear cells                                                                                                                                                         | <a href="https://www.ncbi.nlm.nih.gov/pmc/articles/PMC2466746/bin/postmedj00361-0043-a.jpg">https://www.ncbi.nlm.nih.gov/pmc/articles/PMC2466746/bin/postmedj00361-0043-a.jpg</a><br><br><a href="https://www.ncbi.nlm.nih.gov/pmc/articles/PMC2466746/bin/postmedj00361-0043-b.jpg">https://www.ncbi.nlm.nih.gov/pmc/articles/PMC2466746/bin/postmedj00361-0043-b.jpg</a>                                                                                                                                                                                                                                             |
| Oka K, et al. Virchows Arch. 2005 (35)   | 42-year-old male<br>39-year-old male<br><br>Enterovirus                      | <ul style="list-style-type: none"> <li>- Myocytolysis</li> <li>- Patchy necrosis</li> <li>- Neutrophilic abscess</li> <li>- Infiltration of lymphocytes</li> <li>- Cell-debris</li> <li>- Macrophages</li> </ul> | <a href="https://media.springernature.com/full/spri nger-static/image/art%3A10.1007%2Fs00428-004-1173-3/MediaObjects/s00428-004-1173-3fhh1.jpg?as=webp">https://media.springernature.com/full/spri nger-static/image/art%3A10.1007%2Fs00428-004-1173-3/MediaObjects/s00428-004-1173-3fhh1.jpg?as=webp</a><br><a href="https://media.springernature.com/full/spri nger-static/image/art%3A10.1007%2Fs00428-004-1173-3/MediaObjects/s00428-004-1173-3fhh2.jpg?as=webp">https://media.springernature.com/full/spri nger-static/image/art%3A10.1007%2Fs00428-004-1173-3/MediaObjects/s00428-004-1173-3fhh2.jpg?as=webp</a> |
| <b>EM</b>                                |                                                                              |                                                                                                                                                                                                                  |                                                                                                                                                                                                                                                                                                                                                                                                                                                                                                                                                                                                                        |
| Leone O, et al. Virchows Arch. 2019 (5)  | 43-year-old male with primary hypereosinophilic syndrome                     | Eosinophils degranulated or not, together with some lymphocytes and macrophages and initial thrombotic deposition on the endocardium surface                                                                     | <a href="https://media.springernature.com/full/spri nger-static/image/art%3A10.1007%2Fs00428-019-02615-8/MediaObjects/428_2019_2615_Fig3_HTML.jpg?as=webp">https://media.springernature.com/full/spri nger-static/image/art%3A10.1007%2Fs00428-019-02615-8/MediaObjects/428_2019_2615_Fig3_HTML.jpg?as=webp</a>                                                                                                                                                                                                                                                                                                        |
| Leone O, et al. Virchows Arch. 2019 (5)  | 28-year-old male in therapy with mesalamine for recurrent ulcerative colitis | <ul style="list-style-type: none"> <li>- Multifocal myocyte damage</li> <li>- Microgranulomas with macrophages, eosinophils, neutrophils, lymphocytes</li> </ul> Immunohistochemistry CD68 + CD15+ CD3+          | <a href="https://media.springernature.com/full/spri nger-static/image/art%3A10.1007%2Fs00428-019-02615-8/MediaObjects/428_2019_2615_Fig4_HTML.png?as=webp">https://media.springernature.com/full/spri nger-static/image/art%3A10.1007%2Fs00428-019-02615-8/MediaObjects/428_2019_2615_Fig4_HTML.png?as=webp</a>                                                                                                                                                                                                                                                                                                        |
| Kanaoka K, et al. Circulation. 2022 (17) | EMB specimens from 215 patients                                              | <ul style="list-style-type: none"> <li>- Myocytes damage</li> <li>- 162 LM with Lymphocytic infiltrate</li> <li>- <u>42 EM with eosinophilic infiltrate</u></li> </ul>                                           | <a href="https://www.ahajournals.org/reader/content/184510a048b/10.1161/CIRCULATIO">https://www.ahajournals.org/reader/content/184510a048b/10.1161/CIRCULATIO</a>                                                                                                                                                                                                                                                                                                                                                                                                                                                      |

|                                           |                                                                                             |                                                                                                                                                                                                                                                                                                                  |                                                                                                                                                                                                                                                                                                                                                                                                                                                                                                                                                                                                                                                                                                                                                                                                                                                                                                                                                                                                                                                                                                                                     |
|-------------------------------------------|---------------------------------------------------------------------------------------------|------------------------------------------------------------------------------------------------------------------------------------------------------------------------------------------------------------------------------------------------------------------------------------------------------------------|-------------------------------------------------------------------------------------------------------------------------------------------------------------------------------------------------------------------------------------------------------------------------------------------------------------------------------------------------------------------------------------------------------------------------------------------------------------------------------------------------------------------------------------------------------------------------------------------------------------------------------------------------------------------------------------------------------------------------------------------------------------------------------------------------------------------------------------------------------------------------------------------------------------------------------------------------------------------------------------------------------------------------------------------------------------------------------------------------------------------------------------|
|                                           |                                                                                             | - 11 GCM with giant cell infiltrate                                                                                                                                                                                                                                                                              | NAHA.121.058869/format/epub/EPUB/graphic/circulationaha.121.058869.fig03.jpg?hmac=1693997579-CroByceU73XB44vh0kimzQ5OcO9BSPSfyZ5KJi86eak%3D                                                                                                                                                                                                                                                                                                                                                                                                                                                                                                                                                                                                                                                                                                                                                                                                                                                                                                                                                                                         |
| <b>GCM</b>                                |                                                                                             |                                                                                                                                                                                                                                                                                                                  |                                                                                                                                                                                                                                                                                                                                                                                                                                                                                                                                                                                                                                                                                                                                                                                                                                                                                                                                                                                                                                                                                                                                     |
| Leone O, et al. Virchows Arch. 2019 (5)   | 34-year male                                                                                | <ul style="list-style-type: none"> <li>-Widespread and Mixed Inflammation: macrophages, lymphocytes, variable component of eosinophils and plasma cells and a substantial number of scattered multinucleated giant cells.</li> <li>-Significant myocyte damage</li> <li>-No clearly formed granulomas</li> </ul> | <a href="https://media.springernature.com/full/springer-static/image/art%3A10.1007%2Fs00428-019-02615-8/MediaObjects/428_2019_2615_Fig2_HTML.jpg?as=webp">https://media.springernature.com/full/springer-static/image/art%3A10.1007%2Fs00428-019-02615-8/MediaObjects/428_2019_2615_Fig2_HTML.jpg?as=webp</a>                                                                                                                                                                                                                                                                                                                                                                                                                                                                                                                                                                                                                                                                                                                                                                                                                       |
| Caforio AL, et al. Eur Heart J. 2007 (13) | EMB from 174 subjects (arrhythmias and heart transplantation with suspicion of myocarditis) | <ul style="list-style-type: none"> <li>-Myocyte necrosis</li> <li>-Fibrosis</li> <li>-162 EMB: lymphocytes infiltrate</li> <li>-<u>5 EMB: giant cells infiltrate</u></li> <li>-7 EMB: others mixed infiltrate</li> <li>-PCR analysis for viruses was performed</li> </ul>                                        | <a href="https://oup.silverchair-cdn.com/oup/backfile/Content_public/Journal/eurheartj/28/11/10.1093_eurheartj_ehm076/2/ehm07601.gif?Expires=1697016563&amp;Signature=1grS0gGlcmtcJYuxiWhJ9ZqeabjP8D7OkVYEo-GuWlInDYb5gX8oQFbAZOVrKkWeAtiDIWNAsbzhS0VZad8TyrE8pKD3ApbhO7bdRyvulKKHDI9BtHnp-QyY5POvwY5WbK7xtdvXz2uYo3phqerIJUySNKAIEJfHtnCrqOtD9-92gXgVc~kWg8bqkqiUq1ZEYcECKJc-YKuyIbxzBI3omqnKwaar7YG1ICwyzdGfFwv8STYWjkztkx6zzhfAKecOhnnsCxmbyWijthyYo~zyomri5Sh4hXrYPUI M5eDMCmaaT99OfXUc27SgXtBOQZteO4Cb54a9ug6EsQskyYHUQ__&amp;Key-Pair-Id=APKAIE5G5CRDK6RD3PGA">https://oup.silverchair-cdn.com/oup/backfile/Content_public/Journal/eurheartj/28/11/10.1093_eurheartj_ehm076/2/ehm07601.gif?Expires=1697016563&amp;Signature=1grS0gGlcmtcJYuxiWhJ9ZqeabjP8D7OkVYEo-GuWlInDYb5gX8oQFbAZOVrKkWeAtiDIWNAsbzhS0VZad8TyrE8pKD3ApbhO7bdRyvulKKHDI9BtHnp-QyY5POvwY5WbK7xtdvXz2uYo3phqerIJUySNKAIEJfHtnCrqOtD9-92gXgVc~kWg8bqkqiUq1ZEYcECKJc-YKuyIbxzBI3omqnKwaar7YG1ICwyzdGfFwv8STYWjkztkx6zzhfAKecOhnnsCxmbyWijthyYo~zyomri5Sh4hXrYPUI M5eDMCmaaT99OfXUc27SgXtBOQZteO4Cb54a9ug6EsQskyYHUQ__&amp;Key-Pair-Id=APKAIE5G5CRDK6RD3PGA</a> |

|                                               |                                                                                                                                                                                     |                                                                                                                                                                                                                                                                                         |                                                                                                                                                                                                                                                                                                                                                                                                                                                                                           |
|-----------------------------------------------|-------------------------------------------------------------------------------------------------------------------------------------------------------------------------------------|-----------------------------------------------------------------------------------------------------------------------------------------------------------------------------------------------------------------------------------------------------------------------------------------|-------------------------------------------------------------------------------------------------------------------------------------------------------------------------------------------------------------------------------------------------------------------------------------------------------------------------------------------------------------------------------------------------------------------------------------------------------------------------------------------|
| Kanaoka K, et al.<br>Circulation. 2022 (17)   | EMB specimens from 215 patients                                                                                                                                                     | <ul style="list-style-type: none"> <li>- Myocytes damage</li> <li>- 162 LM with Lymphocytic infiltrate</li> <li>- 42 EM with eosinophilic infiltrate</li> <li>- <u>11 GCM with giant cell infiltrate</u></li> </ul>                                                                     | <a href="https://www.ahajournals.org/reader/content/184510a048b/10.1161/CIRCULATIONAHA.121.058869/format/epub/EPUB/graphic/circulationaha.121.058869.fig03.jpg?hmac=1693997579-CroByceU73XB44vh0kimzQ5OcO9BSPSfyZ5KJi86eak%3D">https://www.ahajournals.org/reader/content/184510a048b/10.1161/CIRCULATIONAHA.121.058869/format/epub/EPUB/graphic/circulationaha.121.058869.fig03.jpg?hmac=1693997579-CroByceU73XB44vh0kimzQ5OcO9BSPSfyZ5KJi86eak%3D</a>                                   |
| Larsen BT, et al.<br>Circulation. 2013 (42)   | Six patients                                                                                                                                                                        | <ul style="list-style-type: none"> <li>- cardiomyocyte necrosis and cardiomyocyte hypertrophy in all cases</li> <li>-Giant cells, histiocytes, T- and B- lymphocytes</li> <li>-Immunohistochemistry: prevalent CD3+ with scattered CD20+ and numerous CD68+ cells</li> </ul>            | <a href="https://www.ahajournals.org/cms/asset/aab95466-3982-4d1c-87b6-c2d085950430/39fig03.jpg">https://www.ahajournals.org/cms/asset/aab95466-3982-4d1c-87b6-c2d085950430/39fig03.jpg</a><br><a href="https://www.ahajournals.org/cms/asset/1e1f3d2c-a6f8-49cc-a31a-61a2afdd8e47/39fig04.jpg">https://www.ahajournals.org/cms/asset/1e1f3d2c-a6f8-49cc-a31a-61a2afdd8e47/39fig04.jpg</a>                                                                                                |
| <b>CS</b>                                     |                                                                                                                                                                                     |                                                                                                                                                                                                                                                                                         |                                                                                                                                                                                                                                                                                                                                                                                                                                                                                           |
| Leone O, et al.<br>Virchows Arch. 2019 (5)    | <ul style="list-style-type: none"> <li>-47-year female with isolated cardiac sarcoidosis</li> <li>- 32-year-old female with systemic sarcoidosis and cardiac involvement</li> </ul> | <ul style="list-style-type: none"> <li>-Myocyte damage is usually not significant near granulomata</li> <li>- Epithelioid granulomata with giant cells, surrounded by lymphocytes and fibrous tissue.</li> <li>-Himmunoistochemistry: CD68+ CD3+</li> <li>-Mallory trichrome</li> </ul> | <a href="https://media.springernature.com/full/springer-static/image/art%3A10.1007%2Fs00428-019-02615-8/MediaObjects/428_2019_2615_Fig2_HTML.jpg?as=webp">https://media.springernature.com/full/springer-static/image/art%3A10.1007%2Fs00428-019-02615-8/MediaObjects/428_2019_2615_Fig2_HTML.jpg?as=webp</a>                                                                                                                                                                             |
| <b>MVMI</b>                                   |                                                                                                                                                                                     |                                                                                                                                                                                                                                                                                         |                                                                                                                                                                                                                                                                                                                                                                                                                                                                                           |
| Fedrigio M, et al. Am J Transplant. 2015 (22) | Case-controlled pilot study evaluated myocardial inflammatory burden<br>Antibody-mediated rejection<br>EMB from 65 right ventricle                                                  | <ul style="list-style-type: none"> <li>-Intravascular monocytes with endothelial damage</li> <li>-Capillary deposition of complement</li> <li>-Himmunoistochemistry: C4d + CD3+ intravascular localization</li> </ul>                                                                   | <a href="https://ars.els-cdn.com/content/image/1-s2.0-S1600613522000314-gr1.jpg">https://ars.els-cdn.com/content/image/1-s2.0-S1600613522000314-gr1.jpg</a><br><a href="https://ars.els-cdn.com/content/image/1-s2.0-S1600613522000314-gr3.jpg">https://ars.els-cdn.com/content/image/1-s2.0-S1600613522000314-gr3.jpg</a><br><a href="https://ars.els-cdn.com/content/image/1-s2.0-S1600613522000314-gr4.jpg">https://ars.els-cdn.com/content/image/1-s2.0-S1600613522000314-gr4.jpg</a> |
| <b>TM</b>                                     |                                                                                                                                                                                     |                                                                                                                                                                                                                                                                                         |                                                                                                                                                                                                                                                                                                                                                                                                                                                                                           |

|                                                                        |                                                                                                                                                                                      |                                                                                                                                                                                                                                                                                                                  |                                                                                                                                                                                                                                                                                                               |
|------------------------------------------------------------------------|--------------------------------------------------------------------------------------------------------------------------------------------------------------------------------------|------------------------------------------------------------------------------------------------------------------------------------------------------------------------------------------------------------------------------------------------------------------------------------------------------------------|---------------------------------------------------------------------------------------------------------------------------------------------------------------------------------------------------------------------------------------------------------------------------------------------------------------|
| Leone O, et al.<br>Virchows Arch. 2019<br>(5)                          | No data                                                                                                                                                                              | Early stage: necrotic myocytes myofibre<br>eosinophilic changes<br>vacuolar degeneration<br>coagulative necrosis contraction band necrosis<br>Phase of 'myocarditis: inflammatory infiltrates<br>primarily composed of macrophages,<br>occasional neutrophils and a small number of<br>lymphocytes CD68+<br>CD3+ | <a href="https://media.springernature.com/full/springer-static/image/art%3A10.1007%2Fs00428-019-02615-8/MediaObjects/428_2019_2615_Fig7_HTML.jpg?as=webp">https://media.springernature.com/full/springer-static/image/art%3A10.1007%2Fs00428-019-02615-8/MediaObjects/428_2019_2615_Fig7_HTML.jpg?as=webp</a> |
| <b>SARS-CoV-2<br/>infection and/or<br/>vaccination<br/>myocarditis</b> |                                                                                                                                                                                      |                                                                                                                                                                                                                                                                                                                  |                                                                                                                                                                                                                                                                                                               |
|                                                                        | Many more morphological and<br>biomolecular documentations<br>(about 800 well documented), in<br>the period 2020-2024 due to an<br>increase in autopsies aimed at<br>COVID-19 deaths |                                                                                                                                                                                                                                                                                                                  |                                                                                                                                                                                                                                                                                                               |

Legend: LM Lymphocytic Myocarditis; CD3+ T lymphocytes; CD68+ macrophages; EMB endomyocardial biopsy; PCR Polymerase Chain Reaction; GCM giant cell myocarditis; CD4+ T Helper lymphocytes; CD8+ cytotoxic T lymphocytes; CD20+ B lymphocytes; CD138+ plasma cells; LHM lympho-histiocitary myocarditis; NM neutrophilic myocarditis; EM eosinophilic myocarditis; Gram stain + histochemical staining to distinguish bacteria; EM eosinophilic myocarditis; CD15+ marker for myeloid lineages and neutrophilic granulocytes; GCM giant cell myocarditis; CS cardiac sarcoidosis; : MVMI myocarditis with vasculitis and microvascular inflammation; C4d + complement component; TM toxic myocarditis
